# Supplementary material for: A Clinical-Radiomic Nomogram Based on Unenhanced Computed Tomography for Predicting the Risk of Aldosterone-Producing Adenoma
Source: Front Oncol. 2021 Jul 9;11:634879. doi: 10.3389/fonc.2021.634879 (PMC8300014; doi:10.3389/fonc.2021.634879)
Supplement: Supplementary file 3 [file Table_1.xlsx]

## Sheet: Sheet1
Index	mean attenuation value(HU)	maximum attenuation value(HU)	minimum attenuation value(HU)	aldosterone(ng/dl)	renin(ng/ml/h)
1	-10.4	2.66667	-21	6.33	0.21
2	-7.6	14.6667	-29.3333	22.57	0.01
3	-5.86667	13	-30.6667	28.2	0.01
4	-9.3	37.3333	-33.6667	19.19	0.33
5	2.36667	28.6667	-15	41.02	0.01
6	-0.0333333	40.6667	-46	81.68	0.01
7	-0.266667	41.3333	-45.6667	9.9	0.01
8	-4.83333	11.6667	-21.3333	32.52	0.03
9	-10	3.33333	-25	11.53	0.07
10	-7.53333	13	-30.3333	30.47	0.03
11	-2.23333	25.6667	-22.6667	31.05	0.21
12	-1.4	30.6667	-29.6667	71.83	0.14
13	-6.26667	28.3333	-39	13.92	0.01
14	6.2	36	-20.3333	17.34	0.01
15	-6.03333	16.6667	-26.6667	31.2	0.01
16	-11.5667	8	-29	28.86	0.01
17	-14.3667	19.3333	-45.3333	13.34	0.01
18	-2.75333	31	-32.3333	12.09	0.02
19	-2.61	18	-17.6667	16.99	0.01
20	-8.1	13	-34.6667	23.56	0.05
21	-17.2333	10.6667	-44.3333	9.14	0.05
22	1.60667	16.6667	-18	16.35	0.02
23	-7.86667	17.3333	-29	30.59	0.01
24	7.36667	28.6667	-30.6667	58.05	0.02
25	4.63333	28.6667	-19	128.97	0.01
26	5.36667	33	-22	21.04	0.02
27	7.73333	29	-16.3333	34.13	0.01
28	5.9	32.6667	-28	38.1	0.78
29	1.56667	38	-40	15.4	0.01
30	1.63333	24.6667	-27	26.52	0.01
31	0.866667	36.6667	-33.3333	33.75	0.01
32	0.433333	20	-17.6667	23.3	0.25
33	8.76667	35	-33	15.28	0.24
34	0.766667	31.3333	-36.3333	68.47	0.01
35	-1.93333	33.3333	-38.3333	43.37	0.01
36	1.66333	36.3333	-44.3333	92.26	0.06
37	3.8	29.3333	-26.6667	35.61	0.87
38	-1.43333	36	-53.6667	21.25	0.01
39	9.16667	35	-22.6667	23.5	0.33
40	-15	24.3333	-56	9.01	0.01
41	3.5	20.3333	-15.6667	46.5	0.01
42	9.36667	39.6667	-38.6667	24.57	0.01
43	4.7	41.3333	-33	10.09	0.01
44	5.5	41.6667	-31	28.29	0.16
45	10.9	39.6667	-17.6667	47.33	0.01
46	4.5	25.6667	-26.6667	11.65	0.01
47	9.23333	47	-17	18.09	0.07
48	5.66667	42.6667	-24.3333	20.24	0.64
49	9.06667	27.6667	-15.6667	16.22	0.01
50	6.6	38	-14.3333	33.54	0.01
51	-5.73333	19.6667	-27	19.2	0.18
52	-11.1333	1	-23.6667	87.07	0.01
53	8.06667	33.6667	-19.6667	7.7	0.01
54	9.46667	36.3333	-14.6667	9.56	0.01
55	9.16667	40.3333	-12.6667	23.98	0.41
56	5.43333	29.6667	-21.6667	17.19	0.14
57	-9.56667	30.6667	-59.3333	18.8	0.01
58	7.53333	44	-19	9.85	0.02
59	0.533333	24.3333	-26.3333	16.78	0.03
60	6.1	26.6667	-10.3333	27.73	0.17
61	9.76667	38.3333	-15.3333	23.41	0.01
62	4.9	47.3333	-22.6667	38.3	0.01
63	9.06667	38.3333	-11.6667	8.03	0.07
64	-2.97333	23	-25.6667	38.25	0.01
65	4.46667	52.3333	-17	15.55	0.1
66	10	41.3333	-10.6667	12.5	0.06
67	7.96667	22.6667	-15.3333	17.98	0.02
68	4.1	37.6667	-20.6667	10.22	0.02
69	9.1	33.6667	-19.6667	22.22	0.09
70	-0.19	25.6667	-27	54.23	0.14
71	9.26667	57.6667	-28	57.3	0.01
72	1.63333	40.6667	-51	41.75	0.09
73	2.5	18.3333	-12.6667	20.92	0.02
74	6.2	38.6667	-21	52.56	0.01
75	10.8333	24.6667	-11.6667	29.28	0.06
76	10.6	37.3333	-15	23.8	0.01
77	5.93333	47.3333	-25.6667	75.12	0.43
78	-6.03333	11.3333	-23.6667	85.91	0.01
79	-1.56667	34.6667	-44	13.25	0.54
80	-5.73333	15.3333	-35.3333	69.46	0.01
81	-8.5	17	-25.6667	41.08	0.02
82	-3.53333	12.3333	-17	48.42	0.01
83	-3.18	36.3333	-42	9.15	0.05
84	-3.36667	18.6667	-18.6667	73.19	0.01
85	-15.5333	-2	-30.6667	85.6	0.01
86	4.2	40.6667	-26.3333	27.48	0.02
87	11.9667	48.6667	-17.6667	25.48	0.01
88	8.9	33.3333	-16	21.1	0.08
89	10.6333	39	-17	125.1	0.01
90	8.36667	46.3333	-23	7.16	0.01
